# Supplementary material
Source: publisher figshare collection journal article supplement (https://gsapubs.figshare.com/ndownloader/files/28093506)
Supplement: Supplementary file 1 [file 28093506]

## Sheet: Sheet1
Sample name (naming convention: #Core_#Section_Top(cm)_Bottom(cm), where cm notation is the distance down the core section from the top)	unit	Method	90_2_48_50b	93_2_16_17	94_3_36_38	95_2_20_22	95_2_89.5_91.5	95_3_121_123	112_2_52_54	144_3_3_5	191_2_93.5_95.5	264_1_53_55	276_1 _1_65_67	278_2_58_60	280_2_45.5_47.5	282_3_23_25	285_2_60_62	285_3_33_35	287_2_90_92	288_1_75.5_77.5	288_1_87_89	288_2_26.5_29	295_3_2_4	296_2_63_65	299_2_28_30	303_2_43_45					102_1_93.5_98.5	135_1_98_100a	135_1_98_100b	139_1_6_8	140_2_19_21	144_1_19_21	151_1_9_11	162_1_54_56	162_2_99.5_101.55	169_2_97_99	198_1_84_85	203_1_20.5_22.5	222_1_11_13					105_2_37_39	234_2_101.5_106
Rock Type			Granitoid (clast in UIM)	Granitoid (clast in UIM)	Granitoid (clast in UIM)	Granitoid (clast in UIM)	Granitoid (clast in UIM)	Granitoid (clast in UIM)	Granitoid	Granitoid	Granitoid (clast in LIM)	Granitoid	Granitoid	Granitoid (clast in LIM)	Granitoid (clast in LIM)	Granitoid (clast in LIM)	Granitoid (clast in LIM)	Granitoid (clast in LIM)	Granitoid (clast in LIM)	Granitoid (clast in LIM)	Granitoid (clast in LIM)	Granitoid (clast in LIM)	Granitoid (clast in LIM)	Granitoid (clast in LIM)	Granitoid	Granitoid		Granitoids Mean*			Dolerite	Dolerite	Dolerite	Dolerite	Dolerite	Dolerite	Dolerite	Dolerite	Dolerite	Dolerite	Dolerite	Dolerite	Dolerite		Dolerites Mean*			Felsite	Felsite
Lithological context			Isolated clast in black melt rock	Isolated clast in black melt rock	Isolated clast in black melt rock	Isolated clast in black melt rock	Isolated clast in black melt rock	Isolated clast in black melt rock	Continuous 'in situ' granitoid	Continuous 'in situ' granitoid	Isolated clast in black melt rock	Continuous 'in situ' granitoid	Continuous 'in situ' granitoid	Isolated clast in greyish black melt rock	Isolated clast in greyish black melt rock	Isolated clast in greyish black melt rock	Isolated clast in greyish black melt rock	Isolated clast in greyish black melt rock	Isolated clast in greyish black melt rock	Isolated clast in greyish black melt rock	Isolated clast in greyish black melt rock	Isolated clast in greyish black melt rock	Isolated clast in greyish black melt rock	Isolated clast in greyish black melt rock	Continuous 'in situ' granitoid	Continuous 'in situ' granitoid					Small dike in continuous granitoid	Large dike in continuous granitoid	Large dike in continuous granitoid	Large dike in continuous granitoid	Large dike in continuous granitoid	Large dike in continuous granitoid	Small dike in continuous granitoid	Small dike in continuous granitoid	Small dike in continuous granitoid	Large dike in continuous granitoid	Small dike in continuous granitoid	Small dike in continuous granitoid	Small dike in continuous granitoid					Small dike in continuous granitoid	Small dike in continuous granitoid
Unit (according to the Morgan et al., 2017 subdivision)			3A	3B	3B	3B	3B	4	4	4	4	4	4	4	4	4	4	4	4	4	4	4	4	4	4	4		*no samples excluded			4	4	4	4	4	4	4	4	4	4	4	4	4		*no samples excluded			4	4
Core Depth (mbsf)			730.29	739.37	743.55	745.08	745.775	747.06	794.49	867.95	996.175	1212.67	1249.99	1257.32	1263.45	1270.68	1279.04	1279.98	1285.55	1287.3	1287.41	1288.04	1309.21	1311.9	1320.68	1334.33					763.175	848.52	848.52	853	854.73	865.47	887.04	913.08	914.625	934.83	1016.23	1027.07	1084.69					772.37	1124.14
Sample subdivision			Pre-impact lithology	Pre-impact lithology	Pre-impact lithology	Pre-impact lithology	Pre-impact lithology	Pre-impact lithology	Pre-impact lithology	Pre-impact lithology	Pre-impact lithology	Pre-impact lithology	Pre-impact lithology	Pre-impact lithology	Pre-impact lithology	Pre-impact lithology	Pre-impact lithology	Pre-impact lithology	Pre-impact lithology	Pre-impact lithology	Pre-impact lithology	Pre-impact lithology	Pre-impact lithology	Pre-impact lithology	Pre-impact lithology	Pre-impact lithology					Pre-impact lithology	Pre-impact lithology	Pre-impact lithology	Pre-impact lithology	Pre-impact lithology	Pre-impact lithology	Pre-impact lithology	Pre-impact lithology	Pre-impact lithology	Pre-impact lithology	Pre-impact lithology	Pre-impact lithology	Pre-impact lithology					Pre-impact lithology	Pre-impact lithology
																												Average	2Stdev (2𝜎)																Average	2Stdev (2𝜎)
Al2O3	wt%	ICP-OES	12.4327	14.5208	13.7562	14.0914	11.6368	13.8145	15.072	12.1008	13.712	13.4266	13.384	12.0795	13.387	12.6956	14.2483	17.1919	13.1491	13.5152	13.3839	14.0183	12.7769	12.403	14.4199	12.2182		13.4764	2.36406		16.2526	14.3215	14.5062	15.0115	14.9686	13.6048	14.6488	13.7514	14.7713	14.4745	13.541	12.7679	15.5233		14.4726	1.82576		14.7963	15.1112
CaO	wt%	ICP-OES	2.45969	2.54681	1.72277	1.0772	0.911989	3.1181	1.71418	1.40572	1.79916	1.33246	1.1481	0.716991	0.758557	0.978912	1.26548	0.738917	0.807143	1.34439	1.03827	1.15936	0.646379	1.18788	1.11843	0.891386		1.32868	1.25422		2.39724	9.83607	10.6918	5.31165	8.01967	7.84338	4.82201	5.55805	4.96014	6.81763	3.48207	3.18488	8.79356		6.28601	5.22805		5.93816	4.12076
Cr2O3	wt%	ICP-OES	0.00204124	0.00256589	0.0108056	0.00209737	0.00462721	0.0213532	-0.00426949	-0.00396736	0	0.00247264	0.00521295	0	0.00210073	0	0.00105496	0.00153501	0.000943814	0	0.000454966	0.00379429	0.00324506	0.00103007	0.00286363	0.00392981		0.00266215	0.00991319		0.0929984	0.0935006	0.105854	0.0798074	0.0809817	0.0931602	0.0869646	0.0684699	0.070498	0.0708374	0.0693299	0.0966957	0.0733739		0.0832671	0.0248145		0.0136329	0.0228018
FeO*	wt%	ICP-OES	2.31362	2.04162	1.83291	0.638498	1.27376	1.17613	1.11725	1.11707	1.1078	1.71205	1.14845	0.628867	0.886538	1.09739	1.34325	0.403989	0.791049	1.56137	1.28299	1.64887	0.845992	0.858669	1.3543	0.787606		1.20708	0.931318		9.89737	10.2781	11.1791	12.472	11.2078	11.952	12.4847	11.875	12.9601	12.2909	12.8692	14.2299	10.1339		11.8331	2.51777		4.15114	6.16118
K2O	wt%	ICP-OES	3.03048	3.43416	4.87392	5.79151	3.10873	4.55585	5.41625	4.60764	3.35115	2.3306	2.7797	3.89355	4.5985	3.43631	2.89327	9.07214	4.23182	2.45084	3.35303	3.80301	3.89822	3.212	4.39469	3.72096		4.00993	2.79194		2.89867	0.39088	0.492391	0.649943	0.414202	0.538983	0.598347	0.542303	0.451251	0.947263	0.355842	0.248283	0.457685		0.691234	1.36886		4.36528	3.5085
MgO	wt%	ICP-OES	0.184671	0.796152	0.972442	0.524028	0.718548	0.641295	0.456257	0.357031	0.667908	0.673324	0.579818	0.276822	0.439566	0.523742	0.605193	0.176453	0.386191	0.721482	0.593933	1.18916	0.475891	0.242027	0.657329	0.122061		0.540889	0.506608		9.3956	10.034	9.70328	11.0926	10.2756	10.0462	12.0252	11.175	11.5654	9.15531	13.7684	15.5626	8.963		10.9817	3.83244		3.37833	5.50863
MnO	wt%	ICP-OES	0.0490034	0.0257271	0.0244726	0.00989884	0.0139123	0.0254085	0.0171858	0.0130873	0.0214752	0.0331367	0.0227676	0.0130611	0.0284601	0.021745	0.0255904	0.00927815	0.0143243	0.0305333	0.023141	0.0276914	0.0160194	0.0220633	0.034581	0.0099099		0.0221864	0.0186567		0.159373	0.195471	0.173782	0.268878	0.268315	0.216687	0.225244	0.363062	0.258433	0.211493	0.18025	0.203581	0.178924		0.223346	0.110428		0.107083	0.100052
Na2O	wt%	ICP-OES	4.65365	4.05229	3.75773	3.7796	4.1526	4.62234	4.86436	3.887	4.72559	5.1967	5.56065	4.22472	4.46642	5.29477	6.08364	4.22217	4.61009	5.33621	5.36765	4.92693	4.45176	4.60107	4.93175	4.7073		4.68654	1.17557		2.42323	1.98578	1.99656	2.67902	2.17622	2.42187	2.321	2.33412	2.66996	2.93563	2.01218	2.25359	2.50184		2.36238	0.576619		3.44315	3.62356
P2O5	wt%	ICP-OES	0.0634088	0.0853517	0.0688142	0.0173298	0.0938504	0.0766996	0.0481969	0.0366225	0.0231196	0.0990411	0.0410521	0.0201296	0.0337851	0.0329085	0.037333	0.00485268	0.027176	0.0479629	0.0520007	0.0503651	0.0221847	0.0270467	0.0613024	0.0440475		0.0464409	0.0497146		0.0560278	0.0740579	0.106048	0.0686792	0.0646568	0.131435	0.0698272	0.0979548	0.103502	0.151321	0.0929679	0.111622	0.0616619		0.0915202	0.0581426		0.276547	0.293408
SiO2	wt%	ICP-OES	71.4349	72.0881	71.7511	71.9722	75.8007	69.0815	69.5151	74.8426	71.6106	73.8975	74.6955	77.1123	73.5997	76.0413	72.893	67.9502	73.8588	76.81	72.0291	71.3794	75.8821	75.4955	70.1487	74.5985		73.1037	5.04002		47.0202	45.6699	46.0219	45.4393	46.6588	44.2457	42.9799	44.103	44.6414	45.538	40.8453	39.3423	46.058		44.5049	4.53115		55.9703	53.4702
TiO2	wt%	ICP-OES	0.228945	0.369671	0.279278	0.138586	0.19759	0.174368	0.162943	0.129149	0.171044	0.248621	0.224505	0.107015	0.1389	0.210176	0.223895	0.176794	0.167472	0.546866	0.206433	0.252705	0.167359	0.167874	0.233645	0.164709		0.212023	0.18146		0.955268	1.19002	1.11312	1.32886	1.12836	1.25901	1.00744	1.46384	1.67445	1.42723	1.33315	1.83148	0.813752		1.27123	0.570356		0.739492	0.800191
LOI	wt%	ICP-OES	2.49262	1.08178	1.72521	1.23836	1.46607	3.65889	1.47889	0.958135	3.31333	1.23618	0.899977	0.934676	0.85048	0.837831	1.19454	0.913287	0.807806	1.47775	1.04057	1.83859	1.75044	1.53411	1.62849	1.04014		1.47492	1.4834		7.28432	6.50302	4.98846	6.55913	5.26082	6.49682	7.10397	8.24106	8.34563	5.70886	10.8516	12.0955	5.70381		7.31869	4.24398		5.47475	6.77621
total	wt%	ICP-OES	99.3457	101.045	100.776	99.2806	99.3791	100.966	99.8583	99.4509	100.503	100.189	100.49	100.008	99.19	101.171	100.815	100.862	98.8519	103.843	98.3715	100.298	100.936	99.7522	98.9861	98.3088					98.8329	100.572	101.079	100.961	100.524	98.85	98.3733	99.5732	102.472	99.7291	99.4013	101.928	99.2628					98.6542	99.4966
SO2	wt%	ICP-OES	0.198807	-	-	-	0.0395291	0.116665	-	-	-	-	-	-	-	-	-	-	-	-	-	-	-	-	-	-					-	-	-	-	-	-	-	-	-	-	-	-	-					-	-
			99.5445
Cr	mg/kg	ICP-MS	b.d.l.	13.6694	71.2962	5.4566	b.d.l.	99.336	7.14281	7.95767	b.d.l.	8.45848	33.6145	b.d.l.	4.50776	b.d.l.	11.3385	2.15378	4.48258	b.d.l.	b.d.l.	15.1349	11.8752	4.72774	8.07873	23.5828		19.5773	52.8089		672.559	794.658	656.628	554.728	574.243	698.976	664.478	479.359	489.123	564.012	476.85	663.68	555.543		603.449	193.404		90.0125	150.812
Co	mg/kg	ICP-MS	1.81755	5.87708	16.4777	7.14961	3.25482	2.75646	3.50273	3.01583	2.79606	4.26143	3.06037	1.85194	1.75185	2.80031	4.06114	0.476679	2.31054	4.29616	4.04902	3.87625	1.78754	1.313	2.81404	0.84053		3.59161	6.26383		63.3185	73.5974	60.4789	71.2533	64.4734	76.0262	96.6192	67.5834	75.9566	72.4565	55.99	101.34	63.5815		72.5135	26.5214		24.3253	27.7878
Ni	mg/kg	ICP-MS	1.06857	26.1429	69.7858	10.8715	3.98756	13.0662	8.13309	6.94419	6.94236	6.73199	16.9565	12.3324	4.87809	9.82411	19.9618	3.59189	7.06059	8.43988	11.9355	8.56607	23.7957	4.04517	8.00778	27.9683		13.3766	28.0066		299.45	357.874	284.056	227.433	232.353	365.83	307.189	300.008	313.082	272.568	275.95	374.99	253.776		297.274	94.863		98.8174	150.833
Cu	mg/kg	ICP-MS	5.11636	16.1435	13.6099	11.6333	10.617	0.916687	13.3399	4.35324	8.27376	6.1368	5.33824	11.7461	6.68797	7.10118	8.4427	4.08875	13.0928	8.83452	14.9091	18.3214	3.14476	3.38826	4.00846	2.08223		8.38862	9.63595		87.2171	111.394	89.8748	121.091	103.092	106.029	167.371	105.555	114.112	119.803	91.08	114.67	111.869		111.012	40.4419		19.3909	54.464
Zn	mg/kg	ICP-MS	67.1665	27.5054	21.4078	14.4721	28.1975	b.d.l.	23.7293	6.18353	4.15343	30.9838	b.d.l.	b.d.l.	b.d.l.	1.32125	10.0426	b.d.l.	b.d.l.	20.6405	2.81065	b.d.l.	b.d.l.	b.d.l.	11.5459	37.7365		20.5265	34.1557		145.415	61.5215	72.0596	136.553	92.5674	84.4063	208.273	86.4877	112.065	78.7284	96.51	145.8	63.9378		106.486	84.3113		56.316	58.9996
Ga	mg/kg	ICP-MS	14.6327	17.7867	14.1289	14.1114	14.608	16.1395	21.3827	16.7926	16.814	20.9479	17.1426	15.4094	15.5469	15.3454	18.2692	18.2945	17.8111	22.5096	18.4323	17.2127	13.2118	15.009	19.8499	15.566		16.9564	4.87027		26.222	15.9452	14.4323	22.2566	17.0175	17.6627	23.9613	16.3093	18.6175	19.4659	21.67	37.97	17.117		20.6652	12.4551		30.1793	27.2101
Ge	mg/kg	ICP-MS	b.d.l.	2.51779	1.887	0.570109	b.d.l.	b.d.l.	0.66852	0.56811	1.5984	0.635914	2.36576	1.6108	0.492693	2.08623	2.18134	0.728333	3.26336	5.31782	2.05902	0.820375	0.360206	0.490893	0.793063	1.79646		1.56249	2.40121		4.36288	1.21668	3.59252	3.93032	3.69639	1.2987	1.1561	4.18905	4.67309	1.32186	5.21	5.08	1.02663		3.13494	3.31314		12.3964	10.4011
Rb	mg/kg	ICP-MS	43.3028	84.1455	127.987	119.524	103.566	145.51	144.111	124.218	114.719	72.953	104.084	135.953	149.678	137.658	105.871	229.565	147.749	97.7385	118.362	97.0958	104.737	111.2	127.787	138.27		120.241	69.0233		173.441	22.9032	21.6113	25.1659	19.9333	22.4741	22.2923	25.3528	20.2851	40.2783	14.93	13.41	16.0872		33.7049	85.0017		135.23	102.225
Sr	mg/kg	ICP-MS	132.255	791.604	483.994	471.699	510.834	288.762	477.054	346.466	258.419	473.664	311.042	214.841	228.324	299.321	348.832	488.035	380.907	338.985	356.08	367.791	258.189	229.285	354.457	239.691		360.439	275.006		263.144	367.785	359.331	268.824	315.562	349.725	263.334	351.603	327.797	426.781	290.13	195.88	410.468		322.336	129.961		1641.39	763.782
Y	mg/kg	ICP-MS	22.1201	5.88832	6.79693	4.68609	4.94457	5.00195	4.45121	4.56579	3.69353	6.29635	6.21887	4.10226	5.13692	5.20349	5.64581	6.87003	5.47876	22.5438	4.8854	7.51656	3.44707	3.76754	6.46759	5.92104		6.73542	9.83669		20.4708	21.6909	20.0224	16.4153	19.826	21.2685	15.5367	23.3386	25.6375	23.2244	21.83	26.42	19.2766		21.1506	6.29008		33.4466	34.7174
Zr	mg/kg	ICP-MS	373.125	147.151	122.001	59.0929	102.539	88.8017	85.6261	108.29	97.5082	122.665	100.559	65.9515	77.1532	100.051	110.435	54.2696	102.79	127.949	112.447	89.6818	72.5946	68.273	96.1468	114.954		108.336	121.702		61.4807	76.7963	78.7067	79.4705	72.7101	91.9033	62.475	103.929	112.317	107.366	98.24	123.83	52.9248		86.3191	43.5534		201.75	214.616
Nb	mg/kg	ICP-MS	6.05582	4.64691	6.38262	3.34763	6.88778	5.35834	6.09962	5.20717	4.43181	6.44801	6.49224	4.63955	5.73318	6.53728	7.30172	6.12666	5.82666	20.3343	5.20524	5.88118	5.53949	7.95637	7.66013	6.25937		6.51496	6.246		7.55847	11.8189	10.6453	10.0211	8.88988	13.3152	8.05928	12.848	13.3978	16.5504	11.95	14.8	6.57948		11.2641	5.9444		6.55644	7.08166
Cd	mg/kg	ICP-MS	b.d.l.	b.d.l.	0.0249978	b.d.l.	b.d.l.	b.d.l.	0.0111443	0.0185485	0.00585769	0.0042957	b.d.l.	b.d.l.	b.d.l.	0.000234656	b.d.l.	b.d.l.	b.d.l.	b.d.l.	b.d.l.	b.d.l.	b.d.l.	b.d.l.	b.d.l.	b.d.l.		0.0108464	0.0187634		b.d.l.	0.154112	0.0399628	0.00790494	0.0210108	0.0629413	0.0200709	b.d.l.	b.d.l.	0.019518	b.d.l.	0.01	0.0344648		0.0411095	0.091309		0.0249942	0.0249109
Ba	mg/kg	ICP-MS	696.94	913.044	1367.07	1457.3	477.447	656.564	694.27	684.158	484.467	373.359	389.047	264.623	280.066	511.533	460.999	2332.92	850.467	380.851	680.87	512.003	396.99	220.98	754.075	296.776		672.367	943.542		1321.59	167.047	164.801	105.02	123.412	154.028	83.1202	177.76	120.87	300.669	91.62	41.33	123.465		228.826	668.286		2267.04	1623.89
La	mg/kg	ICP-MS	15.1318	15.1648	9.41865	16.5751	25.1217	26.1673	16.3964	15.8428	9.25107	13.4243	21.0609	17.0565	8.52432	15.9245	16.5316	26.3057	36.9965	53.94	15.3045	16.5211	7.26381	9.67795	18.4157	12.079		18.254	20.3011		11.1461	12.7131	5.80657	7.98903	7.84332	7.66764	7.84598	12.3629	16.0169	9.71014	27.2	15.84	6.88532		11.4636	11.5283		148.768	96.8319
Ce	mg/kg	ICP-MS	27.3067	29.7684	18.2307	29.3695	43.6023	43.8509	31.2437	27.7298	16.5934	26.7331	38.8484	28.6551	16.2738	29.3419	29.6293	48.4767	64.1232	107.262	27.3678	32.3964	13.6302	17.2496	34.9682	21.8686		33.5216	38.8996		27.949	12.7694	12.5137	19.5119	16.0209	15.5138	17.7951	23.18	31.026	21.3498	54.32	39.17	14.6574		23.5213	24.2128		287.99	197.975
Pr	mg/kg	ICP-MS	3.23969	3.42342	2.25188	2.97791	4.41425	4.44692	3.34357	2.87508	1.79403	3.10679	4.10196	2.75207	1.89816	3.25908	3.31082	5.30666	6.34634	12.6495	2.83463	3.59868	1.54775	1.7871	3.6442	2.37151		3.63675	4.44914		3.91511	1.80269	1.83062	2.58613	2.12173	2.20684	2.36042	2.94647	4.06514	2.85658	6.12	5.34	1.87017		3.07861	2.77989		30.6299	22.8102
Nd	mg/kg	ICP-MS	12.9924	13.0061	9.03607	10.7394	14.3626	14.6466	11.982	10.0551	6.2968	11.6825	13.6666	8.75546	6.38295	11.4192	11.6888	18.8755	20.1353	48.4033	10.1168	12.8821	5.74934	6.45928	12.7979	8.47458		12.9419	16.7393		17.2723	9.20224	9.39878	10.8537	9.8015	11.4575	9.93405	14.174	18.4864	14.1495	25.19	22.81	8.63301		13.951	10.9119		106.564	86.0956
Sm	mg/kg	ICP-MS	2.84348	2.29285	1.77621	1.59392	2.10113	2.15002	1.90794	1.52238	1.06994	2.01762	2.2224	1.19225	1.1941	2.06951	1.91071	3.36263	2.62731	9.39198	1.69486	2.15076	1.10391	1.09273	2.06425	1.30034		2.19388	3.27669		4.18576	3.11938	2.86581	2.69973	2.75984	3.37887	2.46714	3.92478	4.43424	4.06623	4.96	5.44	2.0713		3.56716	2.0444		15.4944	13.8494
Eu	mg/kg	ICP-MS	1.81733	0.726377	0.514834	0.48108	0.46874	0.59877	0.564082	0.439584	0.314664	0.544429	0.533742	0.286005	0.311878	0.489558	0.497836	0.804872	0.619195	1.99223	0.437791	0.603685	0.252712	0.245951	0.469591	0.335314		0.597927	0.854301		1.33179	1.16316	1.18995	0.976956	1.08922	1.37498	0.849351	1.53356	1.69254	1.54094	1.66	1.79	0.997342		1.32229	0.608514		3.79004	2.99878
Gd	mg/kg	ICP-MS	3.25055	1.55577	1.41747	1.29826	1.75243	1.76203	1.34507	1.21516	0.8762	1.62226	1.5854	0.838458	0.998992	1.33489	1.40042	2.56284	1.58331	6.73169	1.13045	1.87609	0.894792	0.822965	1.61137	0.994559		1.68589	2.4151		3.97919	3.89745	3.93553	2.96672	3.58277	4.41815	2.56337	4.8861	5.49929	5.12965	5.01	5.29	3.15778		4.17815	1.89611		9.42839	9.19284
Tb	mg/kg	ICP-MS	0.521554	0.220073	0.231489	0.163153	0.159339	0.16079	0.159377	0.13917	0.12918	0.202231	0.198579	0.115057	0.145561	0.198682	0.187841	0.268463	0.19154	0.87856	0.1458	0.229094	0.126779	0.10635	0.187317	0.164262		0.217927	0.324877		0.695453	0.615295	0.647762	0.514068	0.614688	0.658516	0.413434	0.809132	0.852595	0.758773	0.77	0.86	0.51065		0.670797	0.276605		1.18892	1.16294
Dy	mg/kg	ICP-MS	3.5084	1.11659	1.19198	0.859758	0.887092	0.894559	0.806452	0.783831	0.621394	1.11071	1.06651	0.645019	0.763315	0.924044	0.984309	1.44188	1.02443	4.57577	0.830769	1.2343	0.61964	0.63786	1.05918	0.874168		1.18592	1.83443		4.04771	3.75903	3.91344	3.18981	3.92034	4.10029	2.87021	4.72316	4.88175	4.59629	4.34	5.01	3.29519		4.04979	1.32581		6.31843	6.33076
Ho	mg/kg	ICP-MS	0.798734	0.223519	0.242734	0.170881	0.166601	0.176986	0.151357	0.147459	0.122239	0.21747	0.197983	0.136434	0.161314	0.192868	0.179313	0.254959	0.207282	0.82022	0.168618	0.246015	0.118306	0.118191	0.198061	0.17627		0.233076	0.363409		0.793401	0.756391	0.803214	0.677344	0.809195	0.77315	0.571728	0.961925	0.976531	0.877661	0.85	1.01	0.686515		0.811312	0.252417		1.22568	1.29453
Er	mg/kg	ICP-MS	2.55964	0.62522	0.703434	0.482567	0.4597	0.418059	0.421378	0.389675	0.336603	0.533802	0.632503	0.395889	0.515092	0.530736	0.537048	0.667169	0.546187	2.1816	0.467738	0.706807	0.364352	0.412038	0.650187	0.562009		0.67081	1.07452		2.24356	2.22944	2.15091	1.84094	2.23062	2.11304	1.56988	2.43458	2.65011	2.30436	2.17	2.84	1.90962		2.2067	0.658891		3.5514	3.70623
Tm	mg/kg	ICP-MS	0.409465	0.0935123	0.106715	0.0813322	0.0729958	0.0644543	0.0711717	0.0593523	0.0507957	0.0823446	0.0921614	0.0684551	0.0962645	0.0747185	0.0792195	0.107772	0.0844795	0.285198	0.071769	0.141103	0.0751675	0.0716969	0.11297	0.0908252		0.105997	0.157947		0.339712	0.29772	0.299363	0.276089	0.323068	0.290385	0.227048	0.321586	0.35107	0.322823	0.3	0.4	0.272384		0.309327	0.0843163		0.517685	0.517984
Yb	mg/kg	ICP-MS	2.92007	0.566794	0.721405	0.389452	0.501839	0.453154	0.402262	0.420546	0.324804	0.553386	0.590556	0.478471	0.640507	0.551579	0.560483	0.586219	0.51747	1.73568	0.468129	0.671653	0.414742	0.469452	0.70299	0.634239		0.678162	1.09382		2.1758	1.86169	1.85536	1.78485	1.9936	1.79775	1.37606	2.04556	2.12172	1.86792	1.77	2.45	1.71104		1.90857	0.520271		3.45139	3.41432
Lu	mg/kg	ICP-MS	0.495799	0.0995938	0.133	0.0679893	0.0836603	0.0707057	0.0505107	0.0589534	0.0670067	0.0864705	0.0916201	0.064221	0.0822423	0.0757347	0.0869258	0.063839	0.0832071	0.226152	0.0728228	0.0925962	0.0785976	0.0750437	0.108468	0.109411		0.10519	0.180154		0.303366	0.243211	0.256535	0.260885	0.290512	0.205883	0.184762	0.290668	0.301952	0.234529	0.24	0.33	0.217332		0.258433	0.0858945		0.493912	0.496101
Hf	mg/kg	ICP-MS	7.98679	3.61855	3.47414	1.62797	3.01752	2.54027	2.34564	3.14513	2.82324	3.62257	3.00806	2.24073	2.87033	3.00148	3.29997	1.59417	3.11581	3.94972	3.19139	2.58244	2.14829	2.37308	2.83918	3.0392		3.06065	2.40584		1.79915	1.97903	2.19907	2.22962	2.04883	2.4477	1.79179	2.86559	3.16016	2.89624	2.69	3.35	1.45696		2.37801	1.15667		5.27042	5.65582
Ta	mg/kg	ICP-MS	0.324087	0.322414	0.581552	0.324126	0.5527	0.434136	0.448003	0.414765	0.357666	0.554341	0.512047	0.426289	0.605451	0.640639	0.593081	0.709865	0.536311	1.97555	0.41733	0.511912	0.5458	0.680372	0.671203	0.653707		0.574723	0.641826		0.654527	0.883646	0.90651	0.827444	0.746675	0.999432	0.681654	1.04515	1.09829	1.24945	0.97	1.2	0.525515		0.906792	0.433568		0.541851	0.543211
Pb	mg/kg	ICP-MS	6.03157	18.175	19.4681	21.2151	13.4778	9.79556	22.9853	19.1191	15.069	11.6423	16.0277	31.0041	17.2138	12.8053	12.8169	25.381	18.9025	12.9989	14.8757	12.2807	9.03217	12.1821	19.0826	16.0369		16.1508	11.0816		28.5182	2.27189	2.55857	49.4061	28.0378	7.13573	34.7065	5.14628	4.69517	2.62111	13.5	25.45	2.12089		15.8591	31.2396		8.28111	39.0048
Th	mg/kg	ICP-MS	4.60457	5.14403	29.3514	14.6745	10.1584	9.7325	6.56976	10.7489	8.32678	4.97973	16.8471	18.0194	26.5553	9.28337	11.1389	9.04679	13.2809	22.3869	11.5228	14.493	5.81214	13.6325	16.5953	14.0222		12.7886	12.9743		1.23034	0.529136	0.631222	0.696523	0.656578	0.623678	0.602231	0.738699	0.877153	0.67031	0.94	0.76	0.476288		0.72555	0.395384		44.5889	48.7497
U	mg/kg	ICP-MS	1.60969	3.74289	7.60567	2.70825	4.04804	2.39983	2.72218	4.24152	6.84825	2.31027	5.87247	5.14554	9.95557	5.32621	6.37394	2.60721	5.60636	5.71638	4.94105	4.61727	2.27328	8.15232	5.73729	6.00564		4.85696	4.20608		1.51686	0.123263	0.13691	1.02676	0.194774	0.134022	1.8009	0.268666	0.438701	0.141637	0.33	2.72	0.0991787		0.687052	1.66868		7.51387	11.4592
**SO2 was measured for one sample group and is part of the totals, but is not discussed in the main text.
[truncated: 72 more columns]
